# Supplementary material for: Faster Time to Treatment Decision of Viscoelastic Coagulation Test Results through Improved Perception with the Animated Visual Clot: A Multicenter Comparative Eye-Tracking Study
Source: MDPI journal article supplement (doi:10.3390/diagnostics12051269), 2022-05-19

# Case 1: Normal

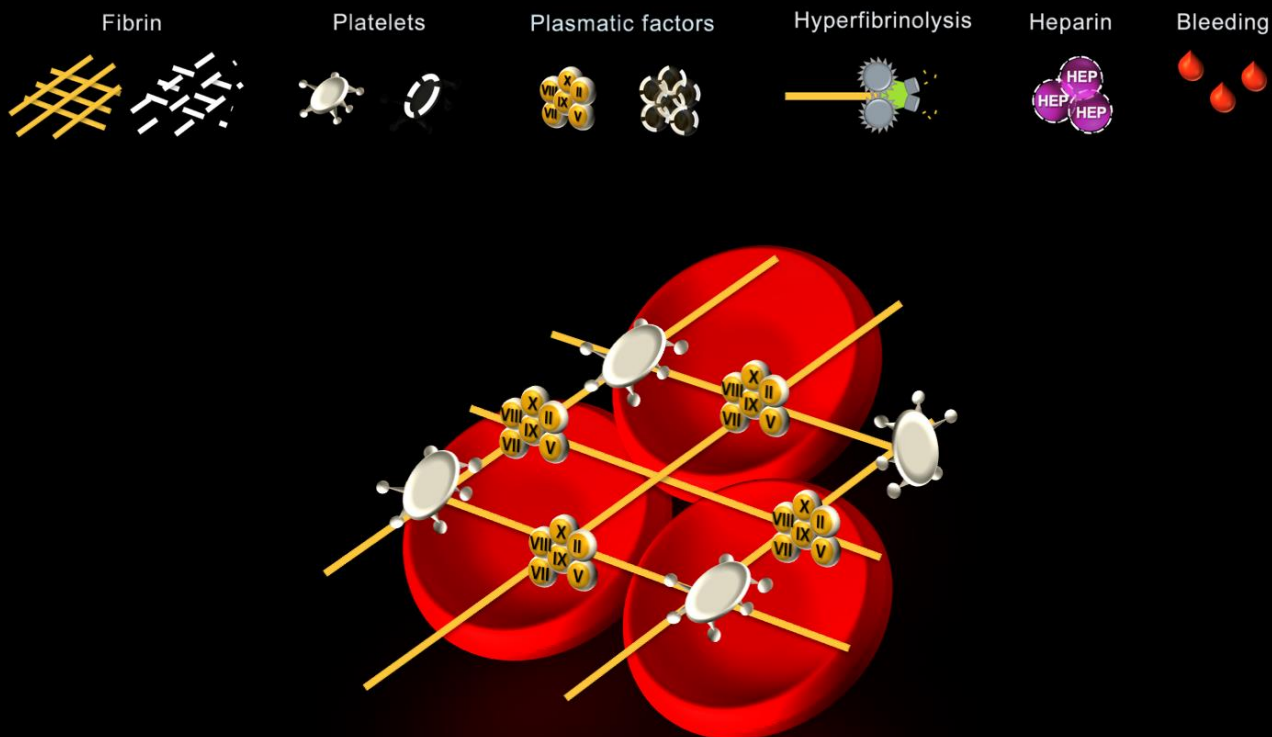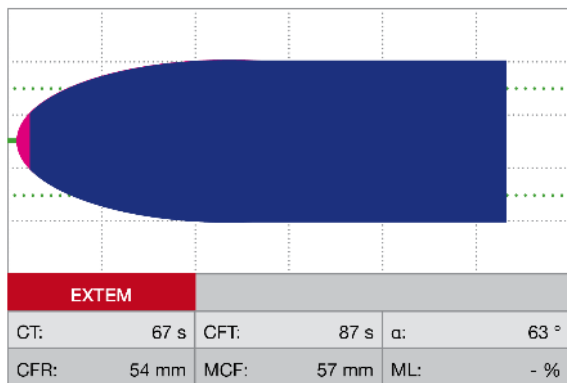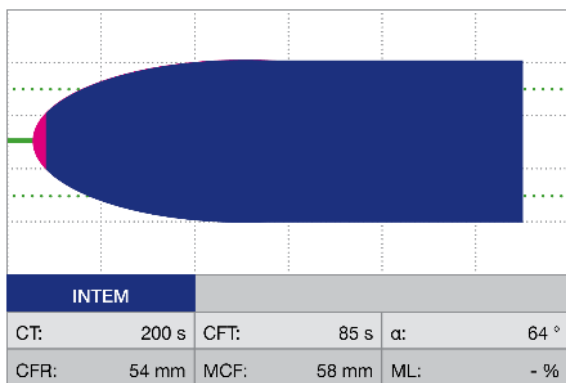

1

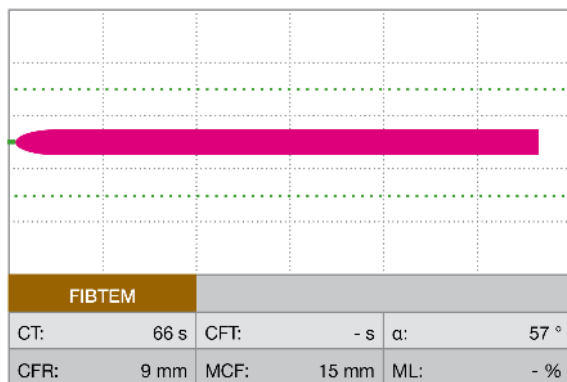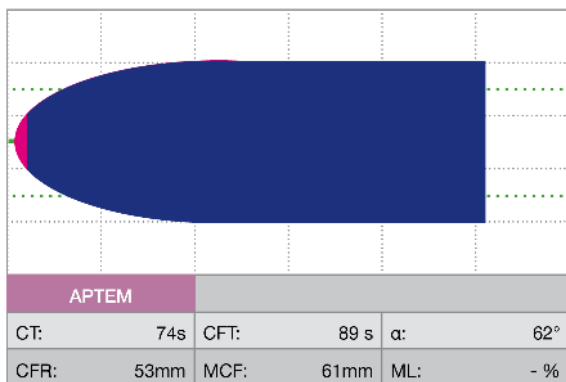

# Case 2: Fibrin deficiency

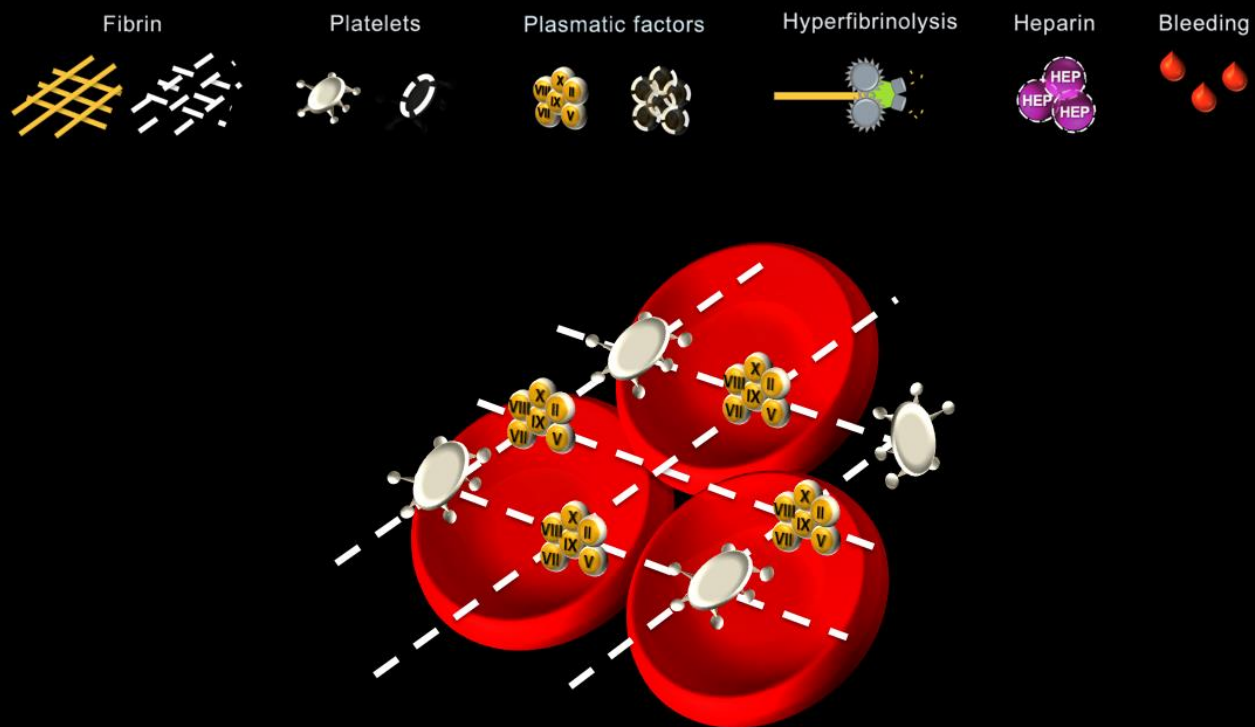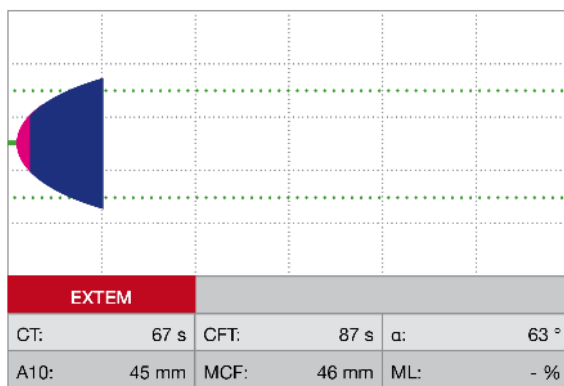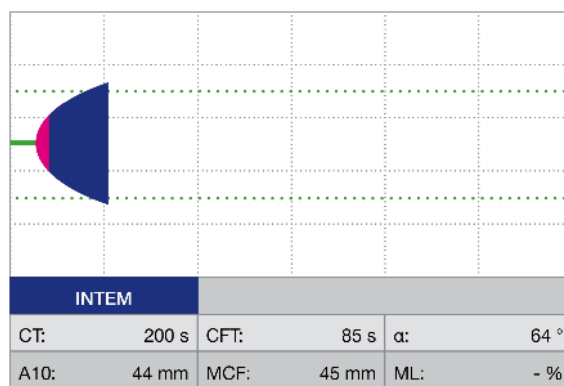

1

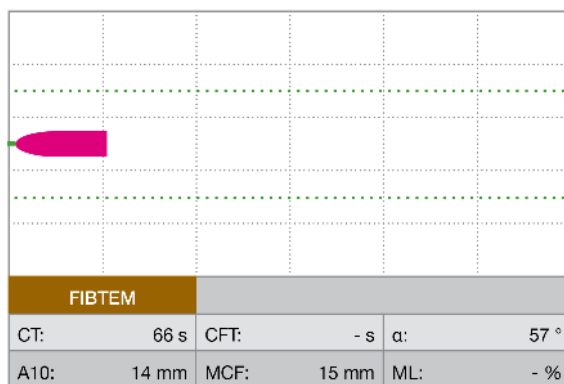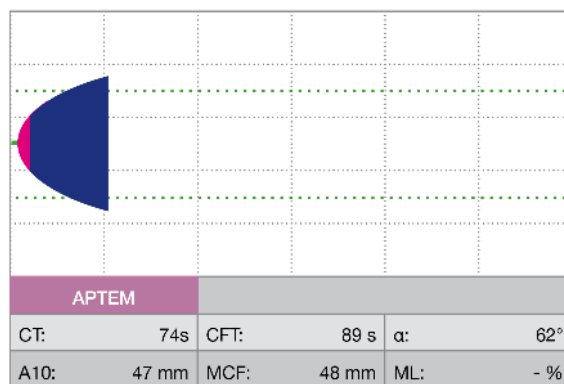

# Case 3: Platelets deficiency

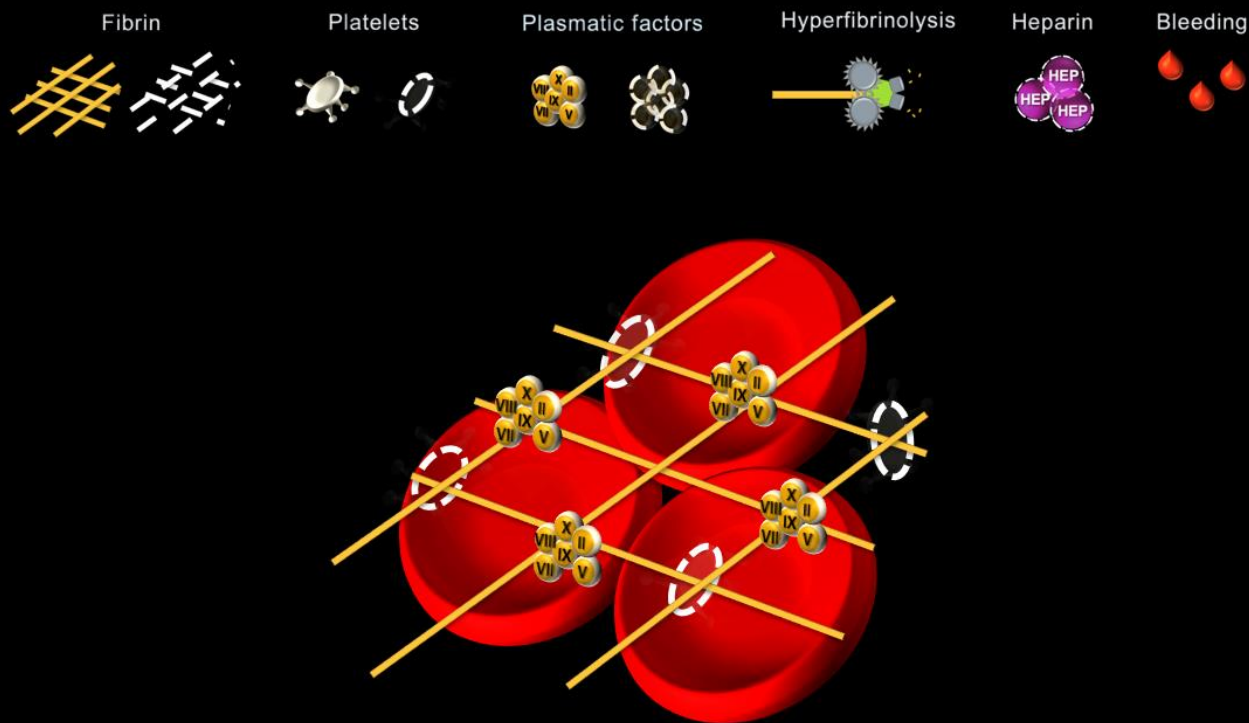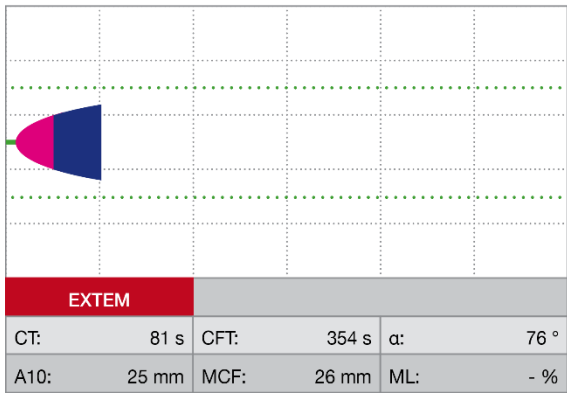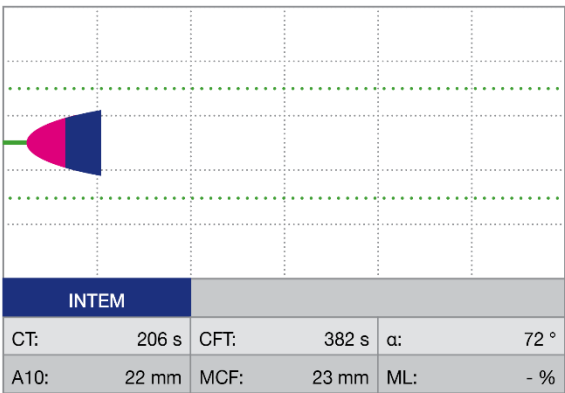

3

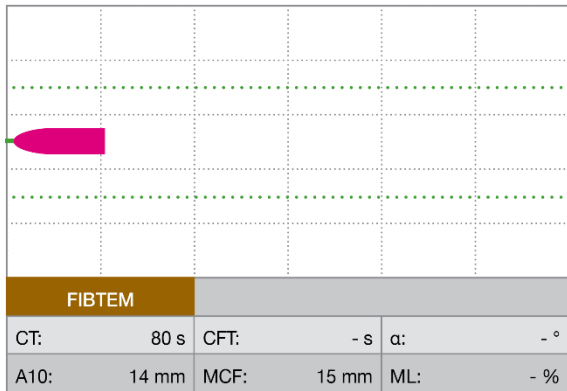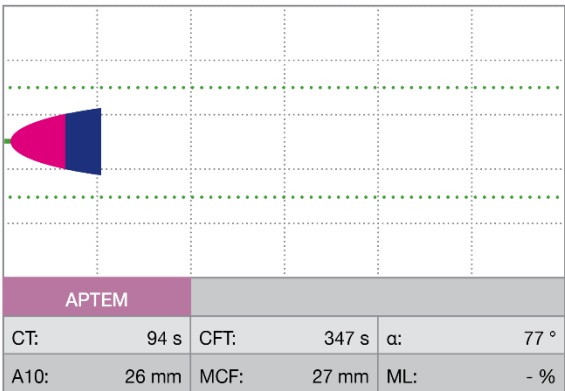

# Case 4: Plasmatic factors deficiency

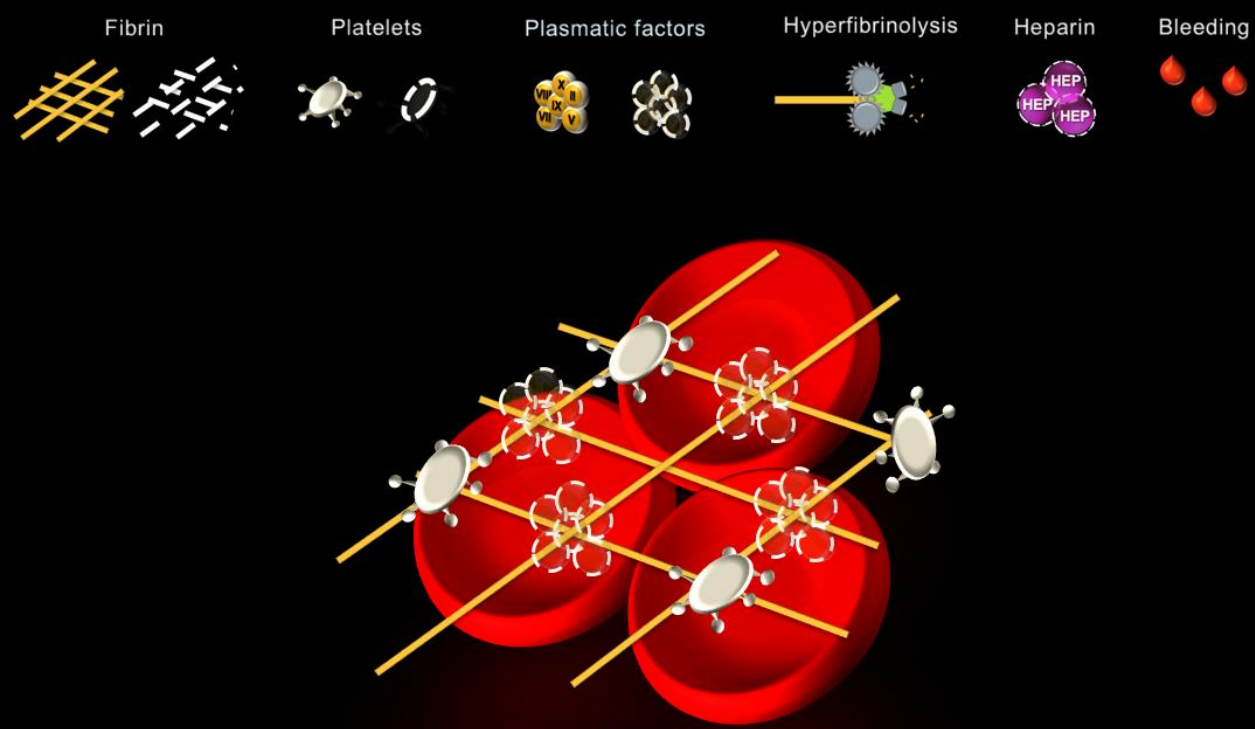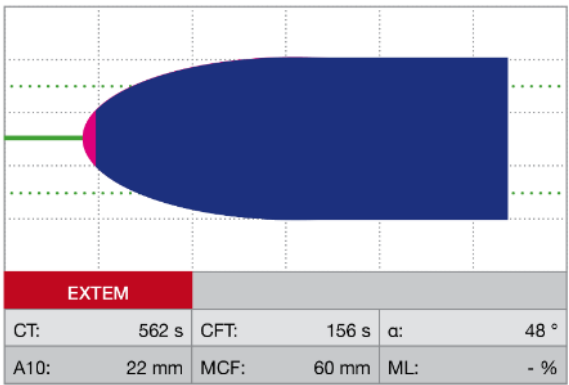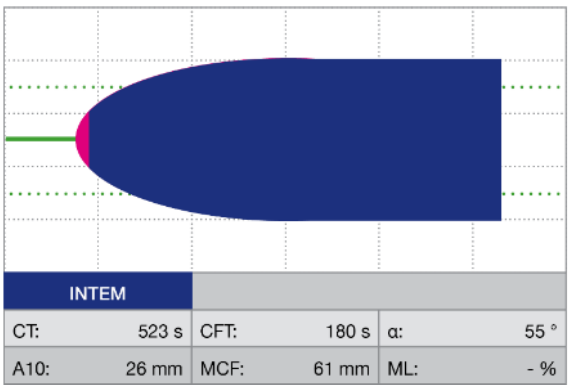

5

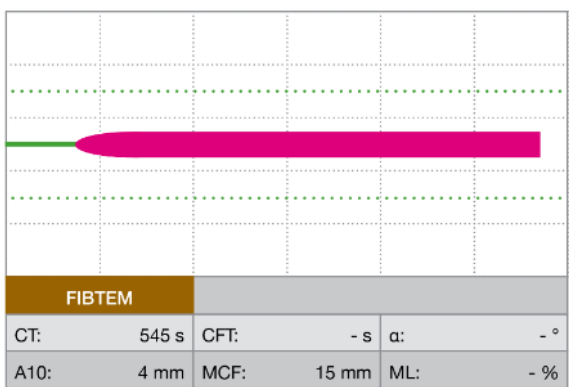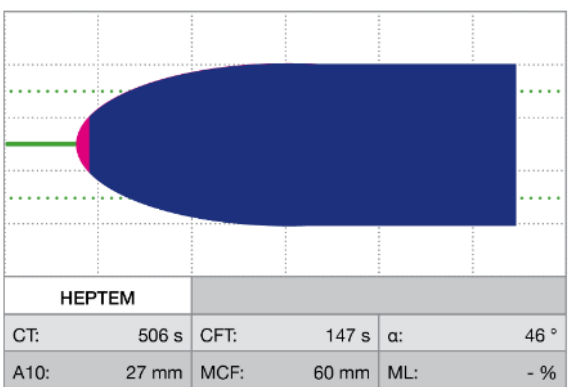

# Case 5: Hyperfibrinolysis

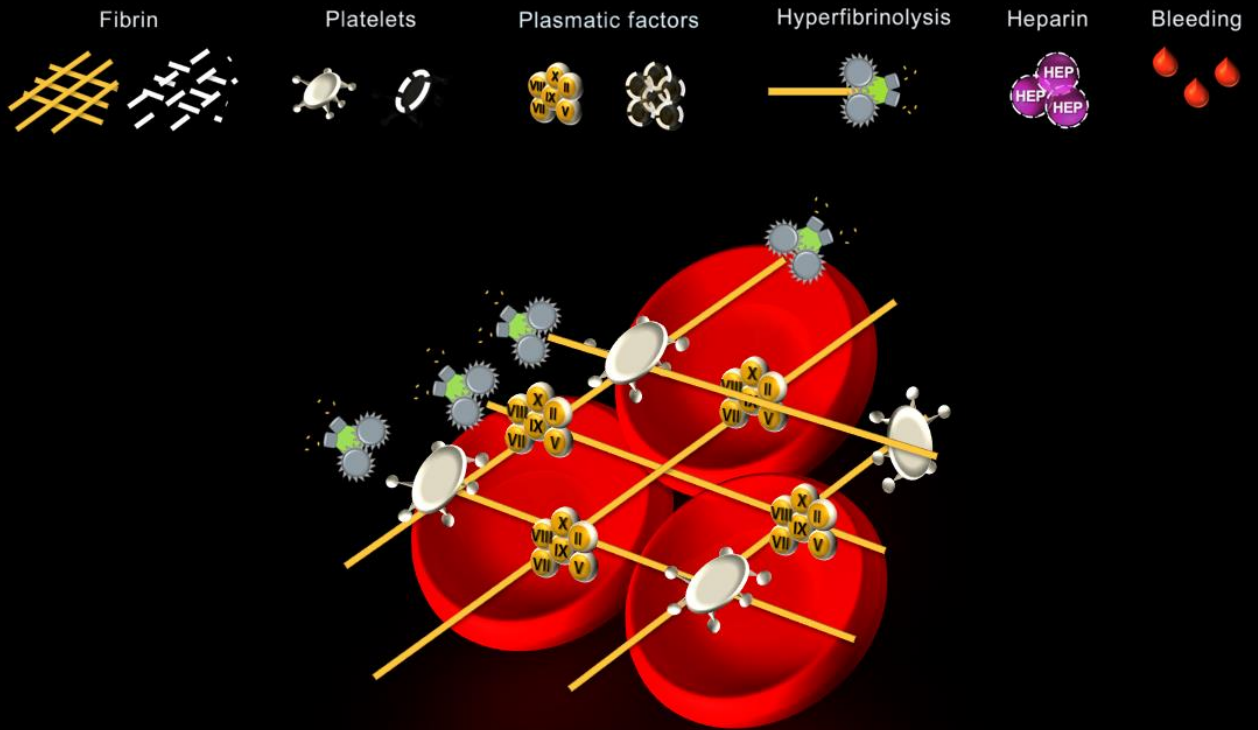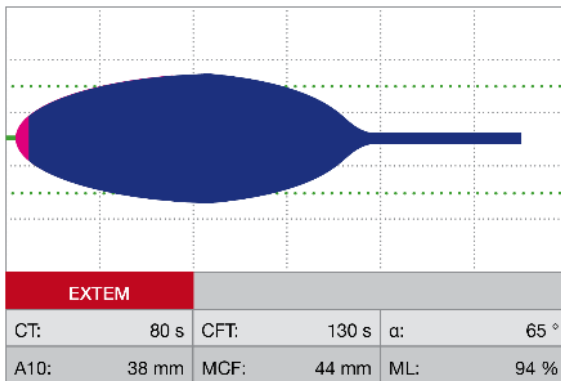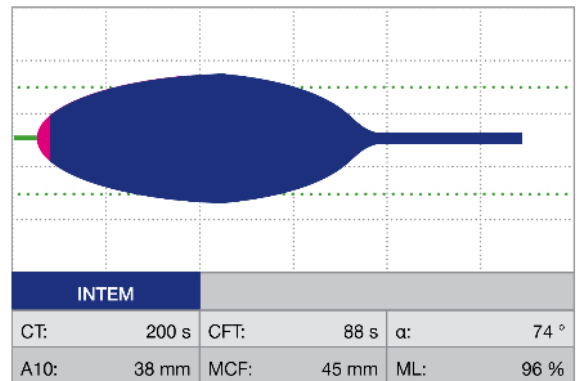

4

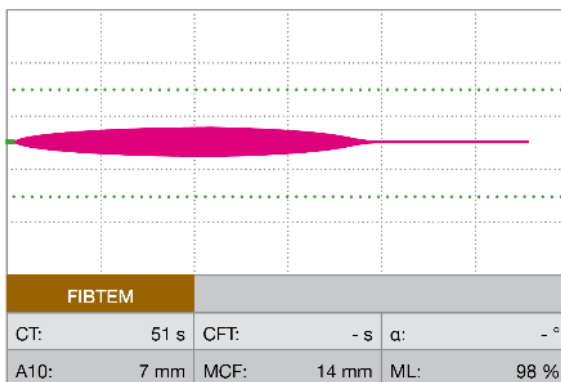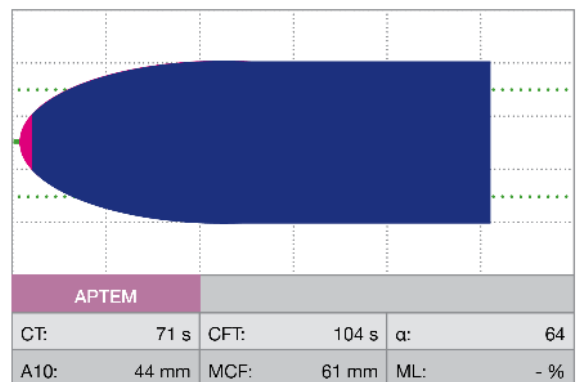

# Case 6: Heparin effect

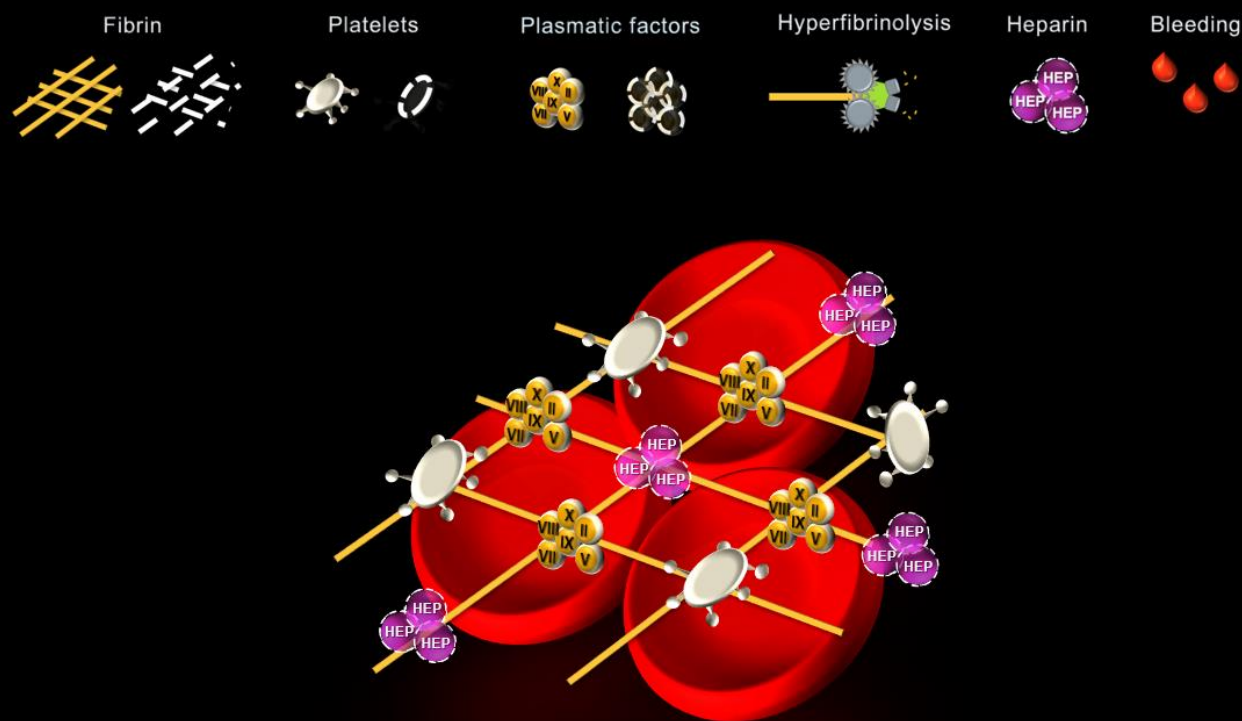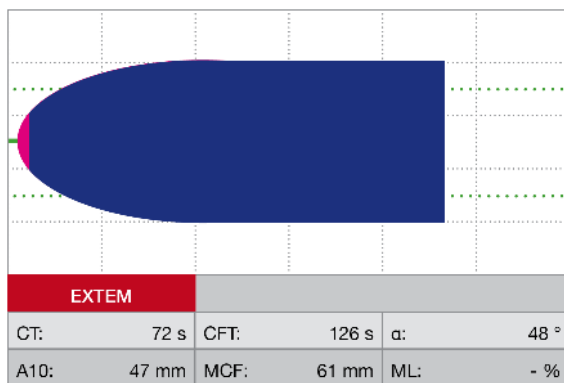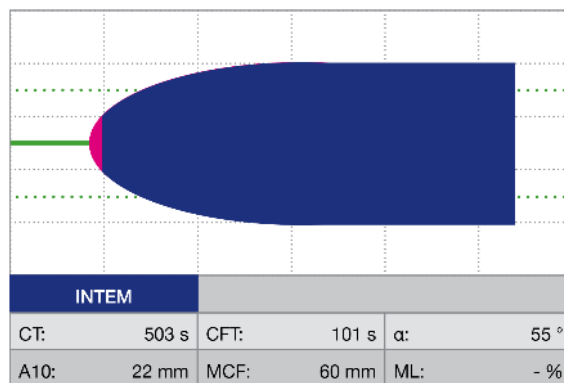

6

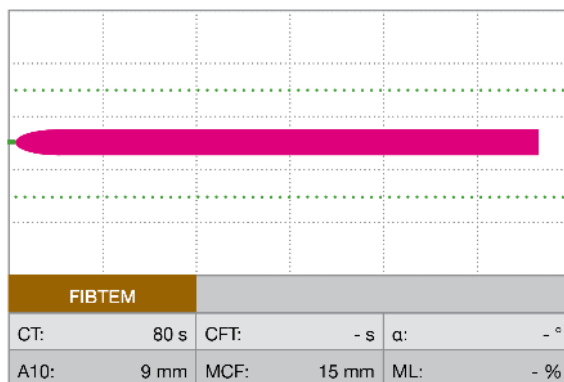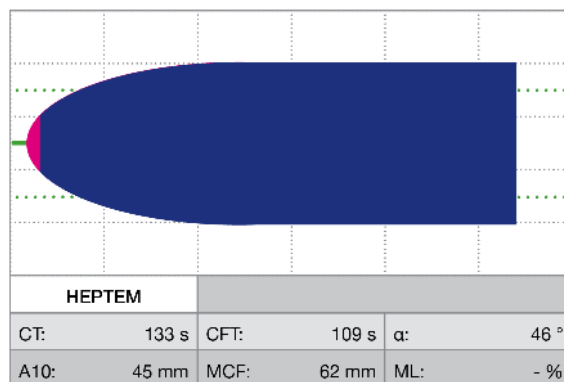



# Case 7: Hypercoagulability

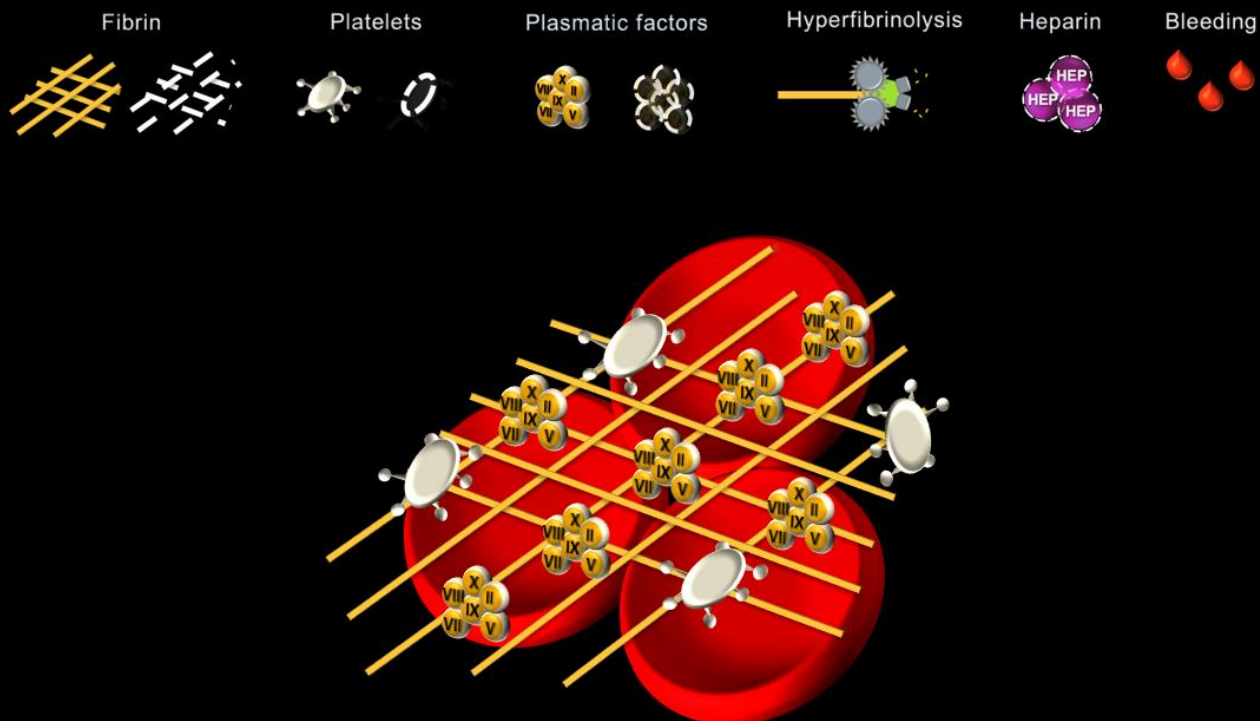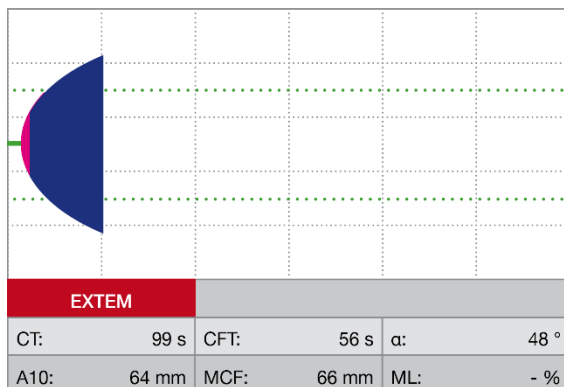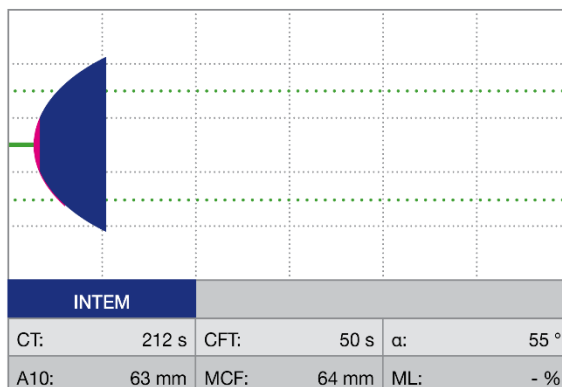

7

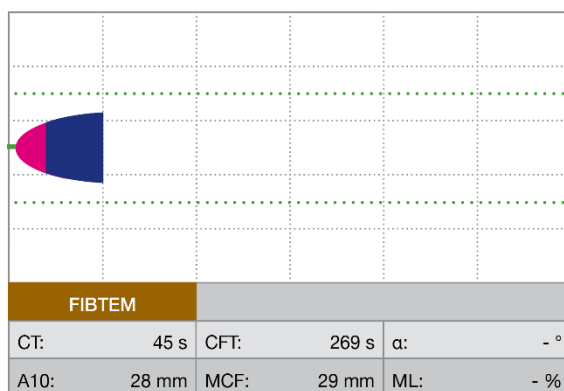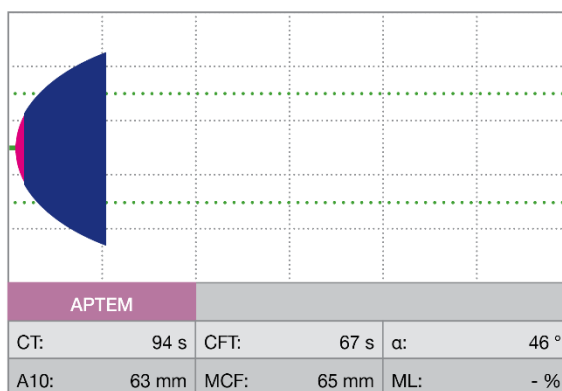

# Case 8: Combined plasmatic factors, fibrin and platelets deficiency

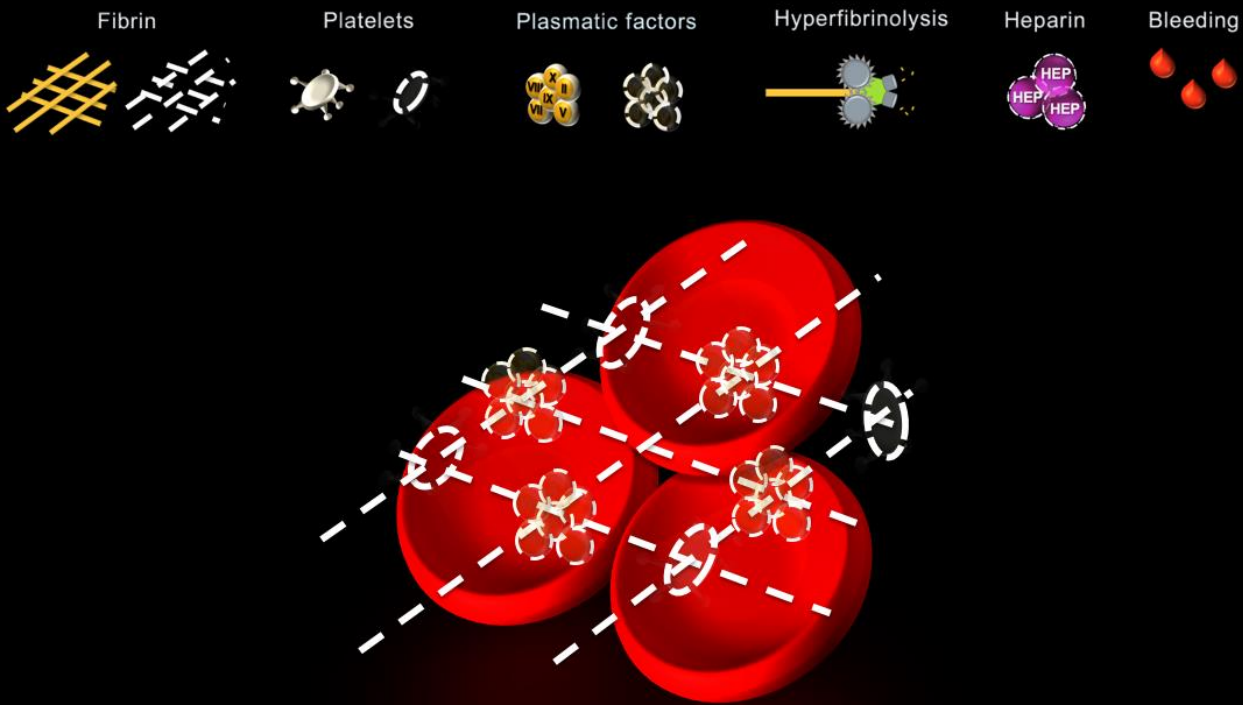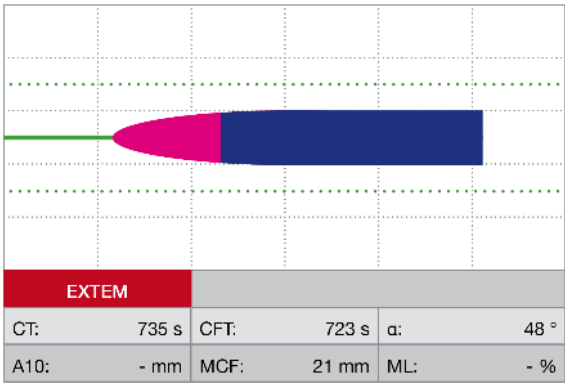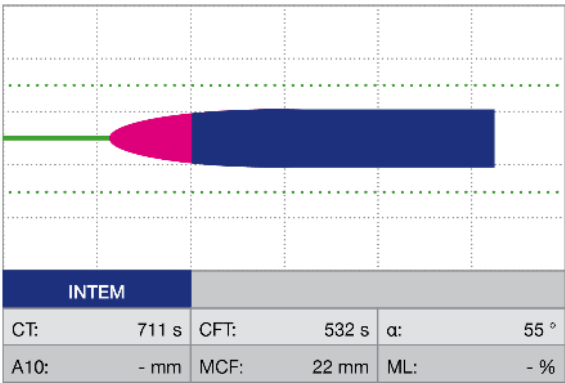

9

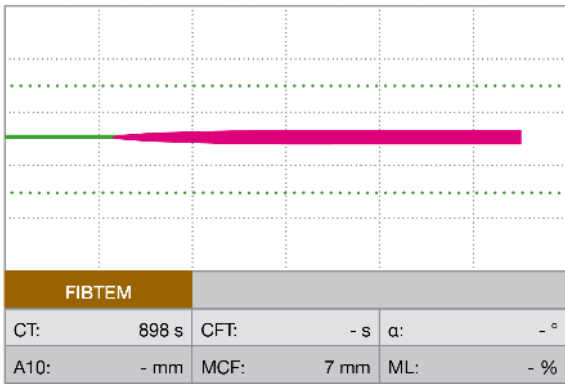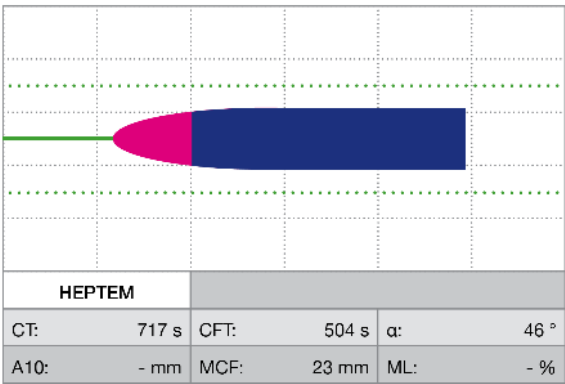



# Case 9: Combined plasmatic factors and fibrin deficiency, and hyperfibrinolysis

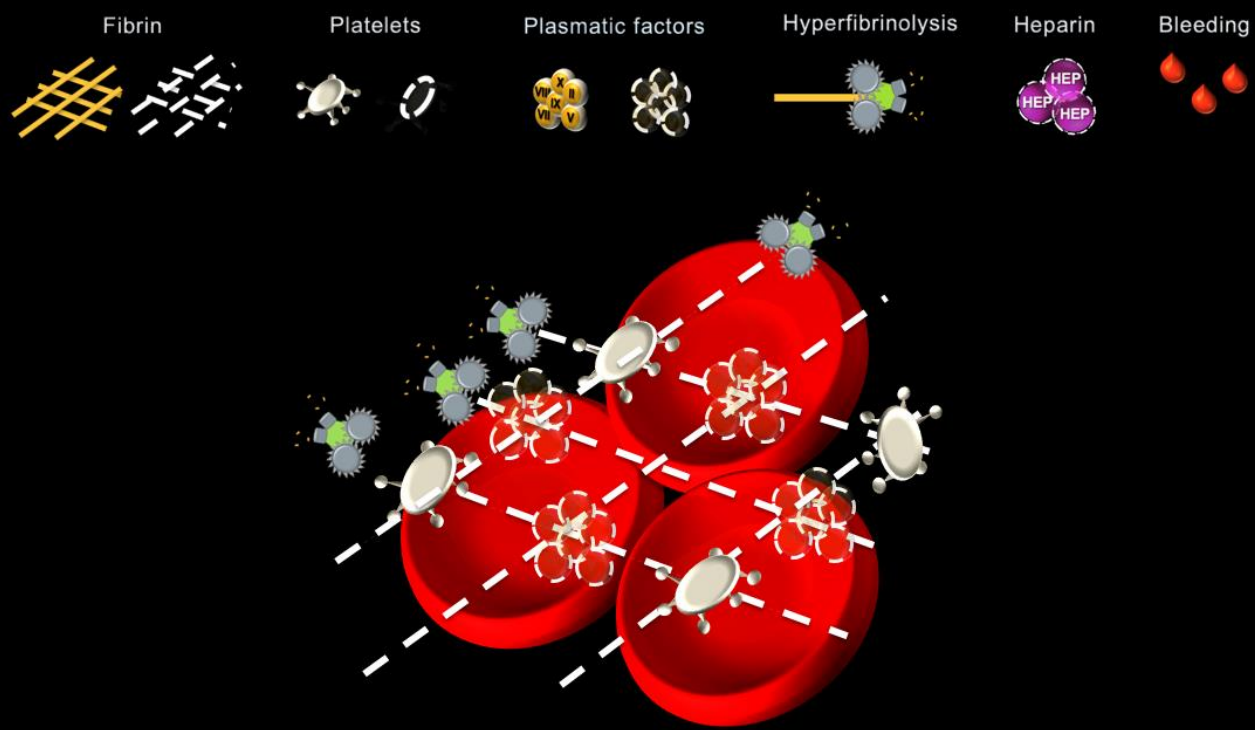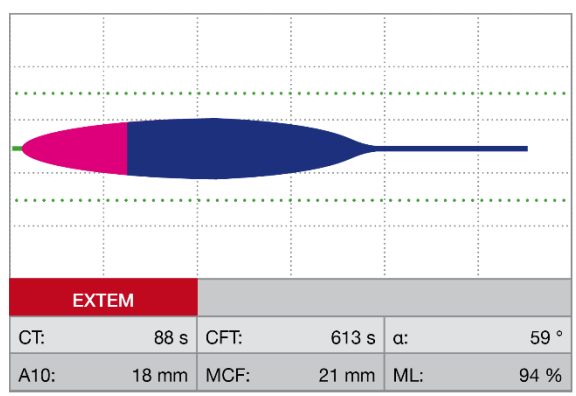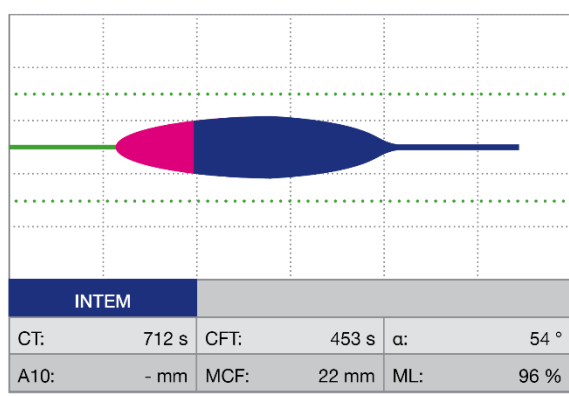

10

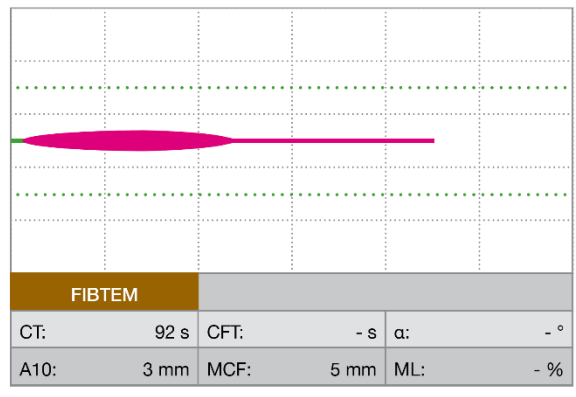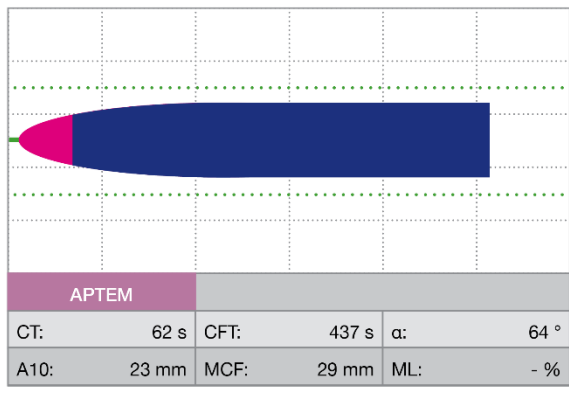

Supplement: s1 [file s1]
