# Supplementary material for: Faster Time to Treatment Decision of Viscoelastic Coagulation Test Results through Improved Perception with the Animated Visual Clot: A Multicenter Comparative Eye-Tracking Study
Source: MDPI journal article supplement (doi:10.3390/diagnostics12051269), 2022-05-19
Supplement: s1 [file s1]

## Faster Time to Treatment Decision of Viscoelastic Coagulation Test Results through Improved Perception with the Animated Visual Clot: A Multicenter Comparative Eye-Tracking Study

Clara Castellucci<sup>1</sup>, Julia Braun<sup>2</sup>; Sadiq Said<sup>1</sup>; Tadzio Raoul Roche<sup>1</sup>; Christoph B Nöthiger<sup>1</sup>; Donat R Spahn<sup>1</sup>; David W Tscholl<sup>1</sup>; Samira Akbas<sup>1</sup>

**Table S1: Visual Clot algorithm\*.** MCF=Maximum Clot Firmness, ML=Maximum Lysis.

|                                     |                                                                                                                                                                                                                                                                                                                            |
|-------------------------------------|----------------------------------------------------------------------------------------------------------------------------------------------------------------------------------------------------------------------------------------------------------------------------------------------------------------------------|
| Fibrin deficiency = true            | IF “MCF FIBTEM” < 9 mm                                                                                                                                                                                                                                                                                                     |
| Thrombocyte deficiency = true       | IF “MCF FIBTEM” 9-25 mm AND “MCF EXTEM” < 40mm OR “MCF INTEM” < 40mm<br>OR<br>IF “MCF FIBTEM” > 25mm AND “MCF EXTEM” < 50mm OR “MCF INTEM” < 50mm<br>OR<br>IF “MCF FIBTEM” < 9mm AND “MCF EXTEM” < 30mm OR “MCF INTEM” < 30mm<br>OR<br>IF “ML INTEM” > 15% OR “ML EXTEM” > 15% OR “ML FIBTEM” > 15% AND “MCF APTEM” < 30mm |
| Plasmatic factors deficiency = true | IF “CT EXTEM” > 79sec OR “CT INTEM” > 240sec AND “Fibrin deficiency” = false AND “Thrombocyte deficiency” = false AND “Hyperfibrinolysis” = false AND “Hypercoagulability” = false AND “Heparin effect” = false<br>OR<br>IF “CT EXTEM” > 100sec OR “CT INTEM” > 260sec.                                                    |
| Hyperfibrinolysis = true            | IF “ML EXTEM” > 15% OR “ML INTEM” > 15% OR “ML FIBTEM” > 15% AND “ML APTEM” < 15%                                                                                                                                                                                                                                          |
| Hypercoagulability = true           | IF “MCF EXTEM” > 72mm or “MCF INTEM” > 72mm                                                                                                                                                                                                                                                                                |
| Heparin effect = true               | IF “CT INTEM” > 240sec AND “CT HEPTTEM” < 240sec                                                                                                                                                                                                                                                                           |

\*This algorithm was published before in:

Wetli DJ, Bergauer L, Nöthiger CB, Roche TR, Spahn DR, Tscholl DW, Said S. Improving Visual-Patient-Avatar Design Prior to Its Clinical Release: A Mixed Qualitative and Quantitative Study. *Diagnostics* (Basel). 2022 Feb 21;12(2):555. doi: 10.3390/diagnostics12020555. PMID: 35204644; PMCID: PMC8871093.

It is provided as a courtesy to the reader for completeness of information.
