# Supplementary material for: Faster Time to Treatment Decision of Viscoelastic Coagulation Test Results through Improved Perception with the Animated Visual Clot: A Multicenter Comparative Eye-Tracking Study
Source: Diagnostics (Basel). 2022 May 19;12(5):1269. doi: 10.3390/diagnostics12051269 (PMC9140857; doi:10.3390/diagnostics12051269)
Supplement: Supplementary file 1 [file diagnostics-12-01269-s001.zip]

Archive with 4 entries (4 files):
- Figure S1_VisualClot_ROTEM_AOI.pdf
- Figure S2_Cases_1-9_ROTEM-VC_20220321.pdf
- Table S1_VisualClotAlgorithm.pdf
- Video S1_Visual Clot_Educationvideo.mp4
